# Supplementary material for: Maternal high-fat diet alters expression of pathways of growth, blood supply and arachidonic acid in rat placenta
Source: PubMed Central journal article supplement (PMC4153320; doi:10.1017/jns.2013.36), 2014-01-02
Supplement: S2048679013000360sup001.pdf [file S2048679013000360sup001.pdf]

Supplementary table 1 Primer sequences for quantitative PCR

| <b>Gene symbol</b> | <b>Forward primer (5'-3')</b> | <b>Reverse primer (5'-3')</b> |
|--------------------|-------------------------------|-------------------------------|
| <i>Ptgs2</i>       | TCA CCC GAG GAC TGG GCC AT    | CAG CGA ACC GCA GGT GCT CA    |
| <i>Pla2g2a</i>     | GCC ACA GAT TGG TGC TGT GTG A | TGG CCC CCT CGG TAG GAG AAC   |
| <i>Serpine1</i>    | CCT ACG GCG TGT CCT CGG TG    | GAG CTT TCG GAG GGC AGC       |
| <i>Umps</i>        | AGC AGC AGT TGG GAT GGC TGA   | TGC GAG TAT TCC CCG GCC CA    |
| <i>Itga1</i>       | AGC GAG CCC ACG GAA AAG CA    | GCT CCC ACC GCT CCA AGC AT    |
| <i>Limk1</i>       | GGC CCT GAA TGC TGA CTG GCA   | GTT CGG AGC ACC CGT GGC AA    |
| <i>Actb</i>        | TCC ACC CGC GAG TAC AAC CT    | TTG CAC ATG CCG GAG CCG TT    |

Supplementary Table 2. List of upregulated and downregulated genes in placentae of rat dams on high fat diet (HFD) vs. control diet (CD).

| Upregulated genes |         |                         | Downregulated genes |         |                         |
|-------------------|---------|-------------------------|---------------------|---------|-------------------------|
| Gene Symbol       | P value | Fold change<br>HFD v CD | Gene Symbol         | P value | Fold change<br>HFD v CD |
| <i>Limk1</i>      | 0.0175  | 2.03                    | <i>RGD1359529</i>   | 0.0409  | 0.58                    |
| <i>Raet1l</i>     | 0.0023  | 1.92                    | <i>Umps</i>         | 0.0048  | 0.59                    |
| <i>Chmp4b1l</i>   | 0.0410  | 1.91                    | <i>Vim</i>          | 0.0283  | 0.67                    |
| <i>Serpine1</i>   | 0.0449  | 1.80                    | <i>Slc4a4</i>       | 0.0449  | 0.68                    |
| <i>Cyp26b1</i>    | 0.0190  | 1.59                    | <i>RGD1309085</i>   | 0.0188  | 0.69                    |
| <i>Chdh</i>       | 0.0413  | 1.57                    | <i>RGD1306962</i>   | 0.0030  | 0.69                    |
| <i>Pf4</i>        | 0.0227  | 1.55                    | <i>App</i>          | 0.0175  | 0.72                    |
| <i>Bat2</i>       | 0.0072  | 1.54                    | <i>Phyh</i>         | 0.0019  | 0.72                    |
| <i>LOC499779</i>  | 0.0201  | 1.51                    | <i>Tcf21</i>        | 0.0364  | 0.73                    |
| <i>Itga1</i>      | 0.0423  | 1.51                    | <i>Bat5</i>         | 0.0266  | 0.73                    |
| <i>Bcl2a1d</i>    | 0.0091  | 1.50                    | <i>Rbm39</i>        | 0.0160  | 0.74                    |
| <i>Map2k6</i>     | 0.0353  | 1.48                    | <i>Ctnnb1</i>       | 0.0058  | 0.74                    |
| <i>Upp1</i>       | 0.0490  | 1.48                    | <i>Chkb</i>         | 0.0208  | 0.74                    |
| <i>Miox</i>       | 0.0013  | 1.46                    | <i>Gucy1b3</i>      | 0.0444  | 0.74                    |
| <i>Ptgs2</i>      | 0.0438  | 1.44                    | <i>Tardbp</i>       | 0.0085  | 0.75                    |
| <i>Igfbp2</i>     | 0.0025  | 1.43                    | <i>Lamb2</i>        | 0.0494  | 0.75                    |
| <i>Arl6ip5</i>    | 0.0012  | 1.41                    | <i>Fmr1</i>         | 0.0210  | 0.76                    |
| <i>St6galnac3</i> | 0.0427  | 1.40                    | <i>RGD1565775</i>   | 0.0371  | 0.76                    |
| <i>Pla2g2a</i>    | 0.0440  | 1.40                    | <i>Elmo3</i>        | 0.0243  | 0.78                    |
| <i>Actn1</i>      | 0.0058  | 1.39                    | <i>LOC498750</i>    | 0.0107  | 0.78                    |
| <i>Zfp354b</i>    | 0.0136  | 1.38                    | <i>Zfp347</i>       | 0.0086  | 0.79                    |
| <i>Mmp9</i>       | 0.0303  | 1.37                    | <i>Gls2</i>         | 0.0336  | 0.79                    |
| <i>B4galt4</i>    | 0.0472  | 1.36                    | <i>Xpnpep1</i>      | 0.0252  | 0.80                    |
| <i>Rab3d</i>      | 0.0362  | 1.36                    | <i>LOC685878</i>    | 0.0410  | 0.80                    |
| <i>Degs1</i>      | 0.0387  | 1.36                    | <i>Taf1d</i>        | 0.0264  | 0.80                    |
| <i>Pctp</i>       | 0.0319  | 1.35                    | <i>Thra</i>         | 0.0176  | 0.80                    |
| <i>Qsox1</i>      | 0.0303  | 1.35                    | <i>RGD1561108</i>   | 0.0494  | 0.80                    |
| <i>Kcnk12</i>     | 0.0408  | 1.34                    | <i>Dhx15</i>        | 0.0195  | 0.81                    |
| <i>Slc27a1</i>    | 0.0051  | 1.34                    | <i>Smchd1</i>       | 0.0154  | 0.81                    |
| <i>Flnc</i>       | 0.0462  | 1.34                    | <i>Wnk1</i>         | 0.0435  | 0.81                    |
| <i>Hs3st2</i>     | 0.0342  | 1.33                    | <i>Dvl1</i>         | 0.0071  | 0.82                    |
| <i>Cd63</i>       | 0.0089  | 1.33                    | <i>Hs3st1</i>       | 0.0391  | 0.82                    |
| <i>Cd59</i>       | 0.0239  | 1.33                    | <i>Giot1</i>        | 0.0171  | 0.82                    |
| <i>Ero1l</i>      | 0.0326  | 1.32                    | <i>Fbxo11</i>       | 0.0474  | 0.82                    |
| <i>LOC689985</i>  | 0.0129  | 1.32                    | <i>Tmem37</i>       | 0.0376  | 0.82                    |
| <i>Slc6a2</i>     | 0.0404  | 1.30                    | <i>Iws1</i>         | 0.0252  | 0.82                    |
| <i>Rnf128</i>     | 0.0256  | 1.30                    | <i>Arfip2</i>       | 0.0258  | 0.82                    |
| <i>Aprt</i>       | 0.0153  | 1.29                    | <i>Ssbp1</i>        | 0.0306  | 0.82                    |
| <i>Ptgfrn</i>     | 0.0466  | 1.29                    | <i>Nt5dc2</i>       | 0.0409  | 0.82                    |
| <i>LOC307347</i>  | 0.0042  | 1.29                    | <i>Fip1l1</i>       | 0.0391  | 0.82                    |
| <i>Fmr1nb</i>     | 0.0477  | 1.28                    | <i>Cat</i>          | 0.0319  | 0.83                    |
| <i>Dnajb6</i>     | 0.0079  | 1.27                    | <i>RGD1563786</i>   | 0.0248  | 0.83                    |
| <i>LOC362526</i>  | 0.0194  | 1.27                    | <i>Ide</i>          | 0.0280  | 0.83                    |
| <i>Krt19</i>      | 0.0137  | 1.27                    | <i>Hsd17b8</i>      | 0.0373  | 0.83                    |
| <i>B3gnt7</i>     | 0.0195  | 1.26                    | <i>Sfrs2</i>        | 0.0458  | 0.83                    |
| <i>Yif1</i>       | 0.0111  | 1.25                    | <i>Znf667</i>       | 0.0414  | 0.83                    |
| <i>Spryd3</i>     | 0.0023  | 1.25                    | <i>Amacr</i>        | 0.0132  | 0.84                    |

|                   |        |      |                   |        |      |
|-------------------|--------|------|-------------------|--------|------|
| <i>Cgrrf1</i>     | 0.0074 | 1.25 | <i>Tbce</i>       | 0.0170 | 0.84 |
| <i>Ifi35</i>      | 0.0498 | 1.25 | <i>RGD1560523</i> | 0.0164 | 0.84 |
| <i>Cln8</i>       | 0.0402 | 1.25 | <i>Atp5b</i>      | 0.0462 | 0.84 |
| <i>Spns1</i>      | 0.0179 | 1.24 | <i>Gdi1</i>       | 0.0478 | 0.84 |
| <i>Tap1</i>       | 0.0111 | 1.24 | <i>Sarnp</i>      | 0.0137 | 0.85 |
| <i>Tmed5</i>      | 0.0018 | 1.24 | <i>Mllt4</i>      | 0.0204 | 0.85 |
| <i>Sec61a1</i>    | 0.0169 | 1.24 | <i>Ppp2r2d</i>    | 0.0357 | 0.85 |
| <i>Sh2b2</i>      | 0.0302 | 1.23 | <i>Hspa14</i>     | 0.0259 | 0.85 |
| <i>Ifi27</i>      | 0.0212 | 1.23 | <i>Ap1f</i>       | 0.0212 | 0.86 |
| <i>Cspg5</i>      | 0.0006 | 1.23 | <i>Ythdc1</i>     | 0.0327 | 0.86 |
| <i>Pla2g15</i>    | 0.0133 | 1.23 | <i>Ptbp2</i>      | 0.0392 | 0.86 |
| <i>Tap2</i>       | 0.0439 | 1.23 | <i>Psm6</i>       | 0.0446 | 0.86 |
| <i>Csrp1</i>      | 0.0418 | 1.23 | <i>Tmem30a</i>    | 0.0222 | 0.86 |
| <i>Lrrc8a</i>     | 0.0264 | 1.23 | <i>Ostf1</i>      | 0.0440 | 0.86 |
| <i>Tmed9</i>      | 0.0490 | 1.22 | <i>RGD1564940</i> | 0.0099 | 0.86 |
| <i>Mthfs</i>      | 0.0102 | 1.22 | <i>Snx16</i>      | 0.0206 | 0.86 |
| <i>Cflar</i>      | 0.0026 | 1.22 | <i>Exosc9</i>     | 0.0323 | 0.87 |
| <i>Myadm</i>      | 0.0375 | 1.22 | <i>Jup</i>        | 0.0453 | 0.87 |
| <i>LOC688637</i>  | 0.0039 | 1.22 | <i>Prl8a2</i>     | 0.0253 | 0.87 |
| <i>Cd82</i>       | 0.0055 | 1.22 | <i>Geft</i>       | 0.0480 | 0.87 |
| <i>RGD1562758</i> | 0.0024 | 1.22 | <i>Puf60</i>      | 0.0058 | 0.87 |
| <i>Ppt2</i>       | 0.0376 | 1.21 | <i>Epc2l1</i>     | 0.0244 | 0.87 |
| <i>Ppp3ca</i>     | 0.0370 | 1.21 | <i>Thrb</i>       | 0.0094 | 0.87 |
| <i>Cspg5</i>      | 0.0210 | 1.21 | <i>Rgl2</i>       | 0.0194 | 0.87 |
| <i>Rilpl2</i>     | 0.0335 | 1.21 | <i>Nfyc</i>       | 0.0270 | 0.88 |
| <i>Tmem192</i>    | 0.0167 | 1.21 | <i>Cnbp</i>       | 0.0251 | 0.88 |
| <i>Gemin8</i>     | 0.0043 | 1.21 | <i>RGD1310592</i> | 0.0331 | 0.88 |
| <i>Dhrs9</i>      | 0.0058 | 1.21 | <i>Slc25a3</i>    | 0.0476 | 0.88 |
| <i>Vti1a</i>      | 0.0356 | 1.21 | <i>Fbxo30</i>     | 0.0493 | 0.89 |
| <i>RGD1303003</i> | 0.0033 | 1.21 | <i>Bat3</i>       | 0.0473 | 0.89 |
| <i>Ctss</i>       | 0.0403 | 1.21 | <i>Pcyt2</i>      | 0.0258 | 0.89 |
| <i>Gna14</i>      | 0.0475 | 1.20 | <i>Ccnyl1</i>     | 0.0313 | 0.89 |
| <i>RGD1561113</i> | 0.0429 | 1.20 | <i>Rpp38</i>      | 0.0086 | 0.89 |
| <i>Star</i>       | 0.0200 | 1.20 | <i>Parn</i>       | 0.0202 | 0.89 |
| <i>Tor1aip1</i>   | 0.0007 | 1.20 | <i>Casp12</i>     | 0.0233 | 0.89 |
| <i>Snd1</i>       | 0.0252 | 1.20 | <i>Smc1a</i>      | 0.0219 | 0.89 |
| <i>Thrap3</i>     | 0.0322 | 1.19 | <i>Dtx3</i>       | 0.0423 | 0.89 |
| <i>Lrrn2</i>      | 0.0284 | 1.19 | <i>Rplp0</i>      | 0.0236 | 0.90 |
| <i>Hint3</i>      | 0.0142 | 1.19 | <i>Sfrs12</i>     | 0.0376 | 0.90 |
| <i>rnf141</i>     | 0.0006 | 1.19 | <i>Zhx1</i>       | 0.0157 | 0.90 |
| <i>Dio3</i>       | 0.0395 | 1.19 | <i>Pan2</i>       | 0.0483 | 0.90 |
| <i>Rab11b</i>     | 0.0142 | 1.19 | <i>RGD1562646</i> | 0.0442 | 0.91 |
| <i>Abca5</i>      | 0.0223 | 1.19 | <i>RGD1304868</i> | 0.0434 | 0.91 |
| <i>Tmem43</i>     | 0.0391 | 1.19 | <i>Zfp277</i>     | 0.0306 | 0.91 |
| <i>Esyt1</i>      | 0.0214 | 1.18 | <i>Cox7b</i>      | 0.0160 | 0.91 |
| <i>G6pc3</i>      | 0.0269 | 1.18 | <i>Mrps7</i>      | 0.0462 | 0.91 |
| <i>Cyb561d2</i>   | 0.0123 | 1.18 | <i>RGD1565131</i> | 0.0067 | 0.91 |
| <i>Gorasp2</i>    | 0.0171 | 1.18 | <i>Vps16</i>      | 0.0131 | 0.91 |
| <i>Trappc3</i>    | 0.0104 | 1.18 | <i>Yme1l1</i>     | 0.0379 | 0.91 |
| <i>RGD1562125</i> | 0.0183 | 1.18 | <i>Rpl32</i>      | 0.0280 | 0.91 |
| <i>Nr1h2</i>      | 0.0007 | 1.18 | <i>Ttc21b</i>     | 0.0076 | 0.92 |
| <i>RGD1308626</i> | 0.0181 | 1.18 | <i>Abhd14a</i>    | 0.0124 | 0.92 |
| <i>Hnrnpul2</i>   | 0.0177 | 1.17 | <i>Fam126a</i>    | 0.0175 | 0.92 |

|                   |        |      |                   |        |      |
|-------------------|--------|------|-------------------|--------|------|
| <i>Tsku</i>       | 0.0299 | 1.17 | <i>Anks3</i>      | 0.0391 | 0.92 |
| <i>Nsmce1</i>     | 0.0070 | 1.17 | <i>Orc4l</i>      | 0.0356 | 0.92 |
| <i>Znf688</i>     | 0.0302 | 1.17 | <i>Batf3</i>      | 0.0437 | 0.92 |
| <i>Timm22</i>     | 0.0052 | 1.17 | <i>Mks1</i>       | 0.0048 | 0.92 |
| <i>Fam96a</i>     | 0.0106 | 1.17 | <i>Ctsl1</i>      | 0.0438 | 0.92 |
| <i>Eif5a</i>      | 0.0252 | 1.17 | <i>Grin1a</i>     | 0.0351 | 0.92 |
| <i>Unc13d</i>     | 0.0387 | 1.17 | <i>Lrrc14</i>     | 0.0231 | 0.92 |
| <i>Mcf2</i>       | 0.0133 | 1.17 | <i>Zbtb4</i>      | 0.0462 | 0.93 |
| <i>Tax1bp3</i>    | 0.0091 | 1.17 | <i>Pir</i>        | 0.0301 | 0.93 |
| <i>Arf5</i>       | 0.0091 | 1.17 | <i>Zfp418</i>     | 0.0260 | 0.93 |
| <i>Stard3</i>     | 0.0106 | 1.16 | <i>Otud4</i>      | 0.0097 | 0.93 |
| <i>Oaf</i>        | 0.0079 | 1.16 | <i>RGD1562874</i> | 0.0012 | 0.93 |
| <i>Leprot</i>     | 0.0032 | 1.16 | <i>RGD1307986</i> | 0.0225 | 0.94 |
| <i>Arf1</i>       | 0.0343 | 1.16 | <i>Mettl8</i>     | 0.0293 | 0.94 |
| <i>Hnrnpa1</i>    | 0.0286 | 1.16 | <i>Khl18</i>      | 0.0400 | 0.94 |
| <i>Zdhhc14</i>    | 0.0215 | 1.16 | <i>Cercam</i>     | 0.0114 | 0.94 |
| <i>Pycl1</i>      | 0.0087 | 1.16 | <i>Sdr42e1</i>    | 0.0311 | 0.94 |
| <i>Atrnl1</i>     | 0.0200 | 1.16 | <i>Slc25a14</i>   | 0.0447 | 0.94 |
| <i>Tyro3</i>      | 0.0366 | 1.16 | <i>Ankrd16</i>    | 0.0203 | 0.95 |
| <i>Slc38a10</i>   | 0.0069 | 1.16 | <i>RGD1561551</i> | 0.0299 | 0.95 |
| <i>RGD1562987</i> | 0.0069 | 1.16 | <i>Ppp1r14c</i>   | 0.0471 | 0.95 |
| <i>Emd</i>        | 0.0205 | 1.16 | <i>Hoxc6</i>      | 0.0464 | 0.95 |
| <i>Psmc3</i>      | 0.0113 | 1.16 | <i>Vav3</i>       | 0.0314 | 0.95 |
| <i>Dnajc18</i>    | 0.0126 | 1.16 | <i>Kel</i>        | 0.0408 | 0.95 |
| <i>Vkorc1l1</i>   | 0.0224 | 1.16 | <i>Figl1</i>      | 0.0487 | 0.96 |
| <i>Nudt9</i>      | 0.0206 | 1.16 | <i>RGD1562012</i> | 0.0212 | 0.96 |
| <i>Rc3h1</i>      | 0.0355 | 1.16 | <i>Morn4</i>      | 0.0411 | 0.96 |
| <i>Kcnn3</i>      | 0.0005 | 1.16 | <i>RGD1566314</i> | 0.0347 | 0.97 |
| <i>Gapdh</i>      | 0.0392 | 1.16 | <i>Fam13c1</i>    | 0.0433 | 0.97 |
| <i>Pom121</i>     | 0.0458 | 1.16 | <i>Dpp4</i>       | 0.0459 | 0.97 |
| <i>Cwc15</i>      | 0.0161 | 1.16 |                   |        |      |
| <i>Cript</i>      | 0.0057 | 1.16 |                   |        |      |
| <i>Faim</i>       | 0.0390 | 1.15 |                   |        |      |
| <i>Pigv</i>       | 0.0399 | 1.15 |                   |        |      |
| <i>RGD1305007</i> | 0.0325 | 1.15 |                   |        |      |
| <i>Ndn12</i>      | 0.0104 | 1.15 |                   |        |      |
| <i>Shisa5</i>     | 0.0146 | 1.15 |                   |        |      |
| <i>Ubl7</i>       | 0.0372 | 1.15 |                   |        |      |
| <i>Snip1</i>      | 0.0192 | 1.15 |                   |        |      |
| <i>Dopey2</i>     | 0.0458 | 1.15 |                   |        |      |
| <i>Tmem87a</i>    | 0.0377 | 1.15 |                   |        |      |
| <i>Enoph1</i>     | 0.0409 | 1.15 |                   |        |      |
| <i>Usp27x</i>     | 0.0257 | 1.15 |                   |        |      |
| <i>Etf1</i>       | 0.0103 | 1.14 |                   |        |      |
| <i>Nfkbil1</i>    | 0.0106 | 1.14 |                   |        |      |
| <i>Styx1l</i>     | 0.0260 | 1.14 |                   |        |      |
| <i>Wbp2</i>       | 0.0015 | 1.14 |                   |        |      |
| <i>Psmc5</i>      | 0.0279 | 1.14 |                   |        |      |
| <i>RGD1305235</i> | 0.0282 | 1.14 |                   |        |      |
| <i>Arf6</i>       | 0.0092 | 1.14 |                   |        |      |
| <i>Tbc1d10b</i>   | 0.0153 | 1.14 |                   |        |      |
| <i>Diablo</i>     | 0.0079 | 1.14 |                   |        |      |
| <i>Ifit1b</i>     | 0.0483 | 1.14 |                   |        |      |

|                   |        |      |
|-------------------|--------|------|
| <i>LOC367191</i>  | 0.0292 | 1.14 |
| <i>Nudc</i>       | 0.0384 | 1.14 |
| <i>Dusp9</i>      | 0.0128 | 1.14 |
| <i>Ccdc23</i>     | 0.0298 | 1.14 |
| <i>Pim1</i>       | 0.0082 | 1.14 |
| <i>Slc10a3</i>    | 0.0396 | 1.14 |
| <i>Yipf1</i>      | 0.0177 | 1.13 |
| <i>Pcbp2</i>      | 0.0151 | 1.13 |
| <i>Bckdha</i>     | 0.0195 | 1.13 |
| <i>Tanc2</i>      | 0.0498 | 1.13 |
| <i>Ppp4c</i>      | 0.0054 | 1.13 |
| <i>Zyg11b</i>     | 0.0328 | 1.13 |
| <i>Coq4</i>       | 0.0212 | 1.13 |
| <i>Tm2d2</i>      | 0.0163 | 1.13 |
| <i>Fcrlb</i>      | 0.0187 | 1.13 |
| <i>Pabpc1l2b</i>  | 0.0146 | 1.13 |
| <i>LOC497934</i>  | 0.0316 | 1.13 |
| <i>Tnpo1</i>      | 0.0188 | 1.13 |
| <i>Cox17</i>      | 0.0472 | 1.13 |
| <i>Thop1</i>      | 0.0365 | 1.13 |
| <i>Prdx1</i>      | 0.0260 | 1.13 |
| <i>Hnrnpk</i>     | 0.0438 | 1.13 |
| <i>Stxbp5</i>     | 0.0208 | 1.13 |
| <i>Tmed2</i>      | 0.0195 | 1.13 |
| <i>Tssc1</i>      | 0.0064 | 1.13 |
| <i>Axin1</i>      | 0.0035 | 1.13 |
| <i>Zxdc</i>       | 0.0188 | 1.12 |
| <i>Scamp2</i>     | 0.0440 | 1.12 |
| <i>Rpl10a</i>     | 0.0458 | 1.12 |
| <i>Commd10</i>    | 0.0285 | 1.12 |
| <i>Ppp1r7</i>     | 0.0008 | 1.12 |
| <i>Pias2</i>      | 0.0017 | 1.12 |
| <i>Uxs1</i>       | 0.0062 | 1.12 |
| <i>Cdc16</i>      | 0.0119 | 1.12 |
| <i>Fam129a</i>    | 0.0353 | 1.12 |
| <i>Pelp1</i>      | 0.0242 | 1.12 |
| <i>Ndufa13</i>    | 0.0477 | 1.12 |
| <i>Fam19a5</i>    | 0.0264 | 1.12 |
| <i>Fam58b</i>     | 0.0119 | 1.12 |
| <i>RGD1564364</i> | 0.0185 | 1.12 |
| <i>Arfrp1</i>     | 0.0286 | 1.12 |
| <i>Cct4</i>       | 0.0108 | 1.12 |
| <i>Gramd2</i>     | 0.0120 | 1.12 |
| <i>Add1</i>       | 0.0306 | 1.12 |
| <i>Soat1</i>      | 0.0387 | 1.11 |
| <i>Fbn2</i>       | 0.0393 | 1.11 |
| <i>Mblac1</i>     | 0.0354 | 1.11 |
| <i>Tmem60</i>     | 0.0417 | 1.11 |
| <i>Arfgef1</i>    | 0.0484 | 1.11 |
| <i>Atp5h</i>      | 0.0482 | 1.11 |
| <i>Exosc6</i>     | 0.0339 | 1.11 |
| <i>Phox2a</i>     | 0.0015 | 1.11 |
| <i>Nfya</i>       | 0.0406 | 1.11 |

|                   |        |      |
|-------------------|--------|------|
| <i>Alg6</i>       | 0.0088 | 1.11 |
| <i>Cdx1</i>       | 0.0383 | 1.11 |
| <i>Cmpk1</i>      | 0.0103 | 1.11 |
| <i>Olr1201</i>    | 0.0070 | 1.11 |
| <i>Rasd2</i>      | 0.0469 | 1.11 |
| <i>Banf1</i>      | 0.0321 | 1.10 |
| <i>Eral1</i>      | 0.0329 | 1.10 |
| <i>Slc35a4</i>    | 0.0103 | 1.10 |
| <i>Cdkn2aipnl</i> | 0.0470 | 1.10 |
| <i>Rpusd4</i>     | 0.0355 | 1.10 |
| <i>Rps3</i>       | 0.0277 | 1.10 |
| <i>Ap3m2</i>      | 0.0264 | 1.10 |
| <i>Zdhhc7</i>     | 0.0205 | 1.10 |
| <i>Gcap14</i>     | 0.0271 | 1.10 |
| <i>Itfg1</i>      | 0.0298 | 1.10 |
| <i>Nrgn</i>       | 0.0094 | 1.10 |
| <i>Rap1a</i>      | 0.0037 | 1.10 |
| <i>Cct2</i>       | 0.0484 | 1.10 |
| <i>Gip</i>        | 0.0244 | 1.10 |
| <i>RGD1562953</i> | 0.0375 | 1.10 |
| <i>Dcbld2</i>     | 0.0444 | 1.09 |
| <i>Gnb2</i>       | 0.0422 | 1.09 |
| <i>Zfp143</i>     | 0.0406 | 1.09 |
| <i>Fut2</i>       | 0.0485 | 1.09 |
| <i>Epn2</i>       | 0.0318 | 1.09 |
| <i>Tecpr1</i>     | 0.0226 | 1.09 |
| <i>RGD1565368</i> | 0.0441 | 1.09 |
| <i>Rbm15b</i>     | 0.0213 | 1.09 |
| <i>Atic</i>       | 0.0182 | 1.09 |
| <i>Ccl17</i>      | 0.0009 | 1.09 |
| <i>Shmt2</i>      | 0.0224 | 1.09 |
| <i>I18rb</i>      | 0.0239 | 1.09 |
| <i>Nucks1</i>     | 0.0430 | 1.09 |
| <i>Csprs</i>      | 0.0352 | 1.09 |
| <i>Dffb</i>       | 0.0077 | 1.09 |
| <i>Nanp</i>       | 0.0177 | 1.09 |
| <i>Blmh</i>       | 0.0409 | 1.09 |
| <i>Cabp7</i>      | 0.0039 | 1.09 |
| <i>Zcchc10</i>    | 0.0445 | 1.09 |
| <i>Paqr3</i>      | 0.0177 | 1.09 |
| <i>Cyp4a10</i>    | 0.0272 | 1.09 |
| <i>Tfpt</i>       | 0.0018 | 1.09 |
| <i>Tsc1</i>       | 0.0056 | 1.09 |
| <i>Dbn1</i>       | 0.0351 | 1.09 |
| <i>B4galnt1</i>   | 0.0364 | 1.09 |
| <i>Scyl2</i>      | 0.0347 | 1.09 |
| <i>N4bp2l2</i>    | 0.0244 | 1.08 |
| <i>Tlr2</i>       | 0.0294 | 1.08 |
| <i>Lrrc15</i>     | 0.0040 | 1.08 |
| <i>Dhrs7b</i>     | 0.0430 | 1.08 |
| <i>H1f0</i>       | 0.0313 | 1.08 |
| <i>Cdc42bpb</i>   | 0.0421 | 1.08 |
| <i>Srgap3</i>     | 0.0385 | 1.08 |

|                   |        |      |
|-------------------|--------|------|
| <i>Mcpt8l3</i>    | 0.0070 | 1.08 |
| <i>LOC501386</i>  | 0.0082 | 1.08 |
| <i>Tlx3</i>       | 0.0066 | 1.08 |
| <i>Rpl6</i>       | 0.0460 | 1.08 |
| <i>Rassf8</i>     | 0.0495 | 1.08 |
| <i>MGC94207</i>   | 0.0236 | 1.08 |
| <i>RGD1562449</i> | 0.0224 | 1.08 |
| <i>Elac2</i>      | 0.0385 | 1.08 |
| <i>Arntl</i>      | 0.0200 | 1.07 |
| <i>Drd2</i>       | 0.0061 | 1.07 |
| <i>Tgfbr1</i>     | 0.0031 | 1.07 |
| <i>Tmem102</i>    | 0.0438 | 1.07 |
| <i>Timm9</i>      | 0.0065 | 1.07 |
| <i>RGD1565456</i> | 0.0293 | 1.07 |
| <i>Cyp2u1</i>     | 0.0390 | 1.07 |
| <i>Fndc5</i>      | 0.0008 | 1.07 |
| <i>Dyx1c1</i>     | 0.0500 | 1.07 |
| <i>Mcpt1l2</i>    | 0.0484 | 1.07 |
| <i>Pomc</i>       | 0.0499 | 1.07 |
| <i>Mapk8</i>      | 0.0140 | 1.07 |
| <i>LOC498470</i>  | 0.0355 | 1.07 |
| <i>Hmgb3</i>      | 0.0059 | 1.07 |
| <i>Zcwpw1</i>     | 0.0062 | 1.07 |
| <i>Slc25a27</i>   | 0.0467 | 1.06 |
| <i>Mllt11</i>     | 0.0434 | 1.06 |
| <i>Cyhr1</i>      | 0.0362 | 1.06 |
| <i>Tmtc1</i>      | 0.0354 | 1.06 |
| <i>Slc2a13</i>    | 0.0281 | 1.06 |
| <i>Hs1bp3</i>     | 0.0035 | 1.06 |
| <i>RGD1559767</i> | 0.0410 | 1.06 |
| <i>Rbm43</i>      | 0.0333 | 1.06 |
| <i>Atxn7</i>      | 0.0015 | 1.06 |
| <i>Fhl4</i>       | 0.0115 | 1.06 |
| <i>Cyp8b1</i>     | 0.0027 | 1.06 |
| <i>LOC686141</i>  | 0.0131 | 1.06 |
| <i>Zfp407</i>     | 0.0443 | 1.06 |
| <i>Cacna1c</i>    | 0.0308 | 1.06 |
| <i>Lrrc30</i>     | 0.0048 | 1.06 |
| <i>Baalc</i>      | 0.0313 | 1.06 |
| <i>RT1-Db1</i>    | 0.0212 | 1.06 |
| <i>Slc44a1</i>    | 0.0341 | 1.05 |
| <i>Nap5</i>       | 0.0317 | 1.05 |
| <i>Nkx1-1</i>     | 0.0127 | 1.05 |
| <i>RGD1560069</i> | 0.0435 | 1.05 |
| <i>Pcp4</i>       | 0.0289 | 1.05 |
| <i>Fkrp</i>       | 0.0183 | 1.05 |
| <i>LOC500705</i>  | 0.0176 | 1.05 |
| <i>Pdyn</i>       | 0.0402 | 1.05 |
| <i>Ntn5</i>       | 0.0215 | 1.05 |
| <i>Capn1</i>      | 0.0275 | 1.05 |
| <i>Ascl3</i>      | 0.0030 | 1.04 |
| <i>Fam69b</i>     | 0.0385 | 1.04 |
| <i>RGD1560050</i> | 0.0192 | 1.04 |

|                   |        |      |
|-------------------|--------|------|
| <i>Doxl2</i>      | 0.0285 | 1.04 |
| <i>Btg4</i>       | 0.0262 | 1.04 |
| <i>LOC688273</i>  | 0.0319 | 1.04 |
| <i>Olr1437</i>    | 0.0215 | 1.04 |
| <i>Slc2a1</i>     | 0.0240 | 1.04 |
| <i>Serpina6</i>   | 0.0173 | 1.04 |
| <i>Tshr</i>       | 0.0271 | 1.04 |
| <i>Arrb1</i>      | 0.0096 | 1.04 |
| <i>Olr157</i>     | 0.0438 | 1.04 |
| <i>RGD1307694</i> | 0.0455 | 1.04 |
| <i>Nfasc</i>      | 0.0423 | 1.04 |
| <i>Cplx1</i>      | 0.0442 | 1.04 |
| <i>RGD1565482</i> | 0.0340 | 1.04 |
| <i>Olr484</i>     | 0.0250 | 1.03 |
| <i>Ddn</i>        | 0.0357 | 1.03 |



Supplementary table 3. List of upregulated genes with a fold change > 1.4 and downregulated genes with a fold change < 0.7 included in the pathway analysis

| <b>Upregulated genes</b><br><b>Gene symbol</b> | <b>P value</b> | <b>Fold change</b><br><b>HFD vs CD</b> | <b>Downregulated genes</b><br><b>Gene symbol</b> | <b>P value</b> | <b>Fold change</b><br><b>HFD vs CD</b> |
|------------------------------------------------|----------------|----------------------------------------|--------------------------------------------------|----------------|----------------------------------------|
| <i>Limk1</i>                                   | 0.018          | 2.03                                   | <i>App</i>                                       | 0.018          | 0.72                                   |
| <i>Raet1l</i>                                  | 0.023          | 1.92                                   | <i>RGD1306962</i>                                | 0.003          | 0.69                                   |
| <i>Chmp4bl1</i>                                | 0.041          | 1.91                                   | <i>RGD1309085</i>                                | 0.019          | 0.69                                   |
| <i>Serpine1</i>                                | 0.045          | 1.80                                   | <i>Slc4a4</i>                                    | 0.045          | 0.68                                   |
| <i>Cyp26b1</i>                                 | 0.019          | 1.59                                   | <i>Vim</i>                                       | 0.028          | 0.67                                   |
| <i>Chdh</i>                                    | 0.041          | 1.57                                   | <i>Umps</i>                                      | 0.005          | 0.60                                   |
| <i>Pf4</i>                                     | 0.02           | 1.55                                   | <i>RGD1359529</i>                                | 0.041          | 0.58                                   |
| <i>Bat2</i>                                    | 0.007          | 1.54                                   |                                                  |                |                                        |
| <i>LOC499779</i>                               | 0.02           | 1.51                                   |                                                  |                |                                        |
| <i>Itga1</i>                                   | 0.04           | 1.51                                   |                                                  |                |                                        |
| <i>Bcl2a1d</i>                                 | 0.009          | 1.50                                   |                                                  |                |                                        |
| <i>Map2k6</i>                                  | 0.035          | 1.48                                   |                                                  |                |                                        |
| <i>Upp1</i>                                    | 0.049          | 1.48                                   |                                                  |                |                                        |
| <i>Miox</i>                                    | 0.001          | 1.46                                   |                                                  |                |                                        |
| <i>Ptgs2</i>                                   | 0.043          | 1.44                                   |                                                  |                |                                        |
| <i>Igfbp2</i>                                  | 0.002          | 1.43                                   |                                                  |                |                                        |
| <i>Arl6ip5</i>                                 | 0.001          | 1.41                                   |                                                  |                |                                        |
| <i>St6galnac3</i>                              | 0.043          | 1.40                                   |                                                  |                |                                        |
| <i>Pla2g2a</i>                                 | 0.044          | 1.40                                   |                                                  |                |                                        |
